# Supplementary material
Source: publisher figshare collection journal article supplement (https://plos.figshare.com/articles/dataset/_/1248173)
Supplement: Supplementary file [file 1]

# MetJ

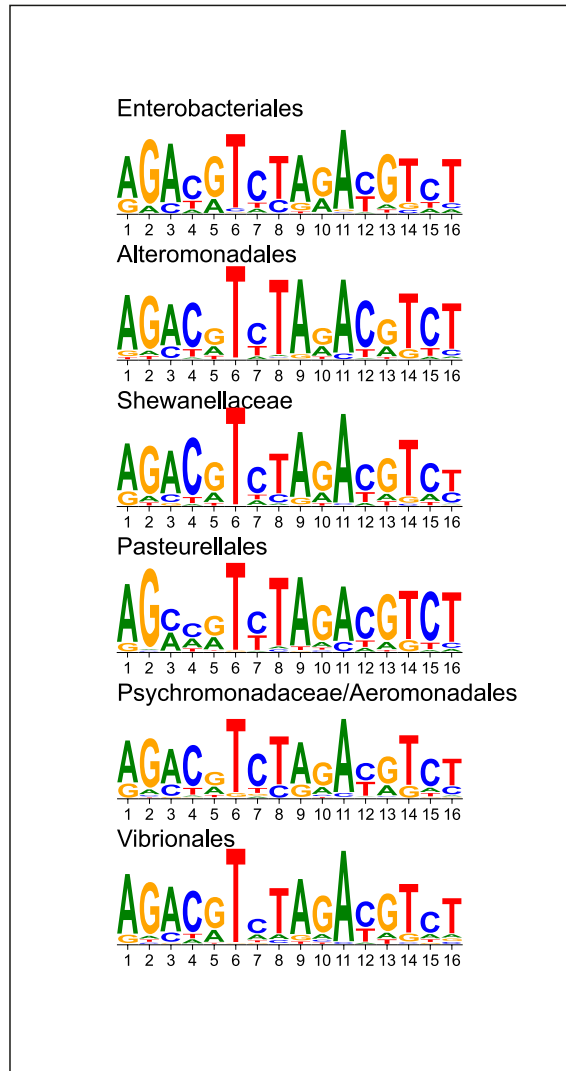

# MetR

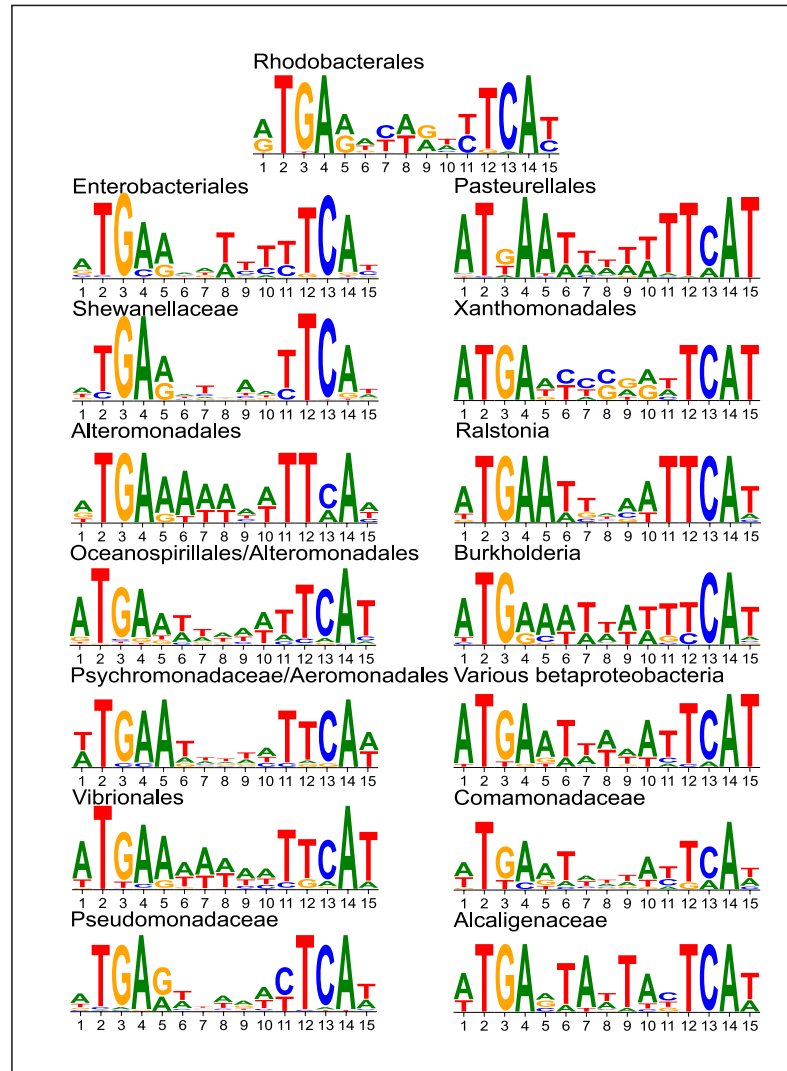

# SahR

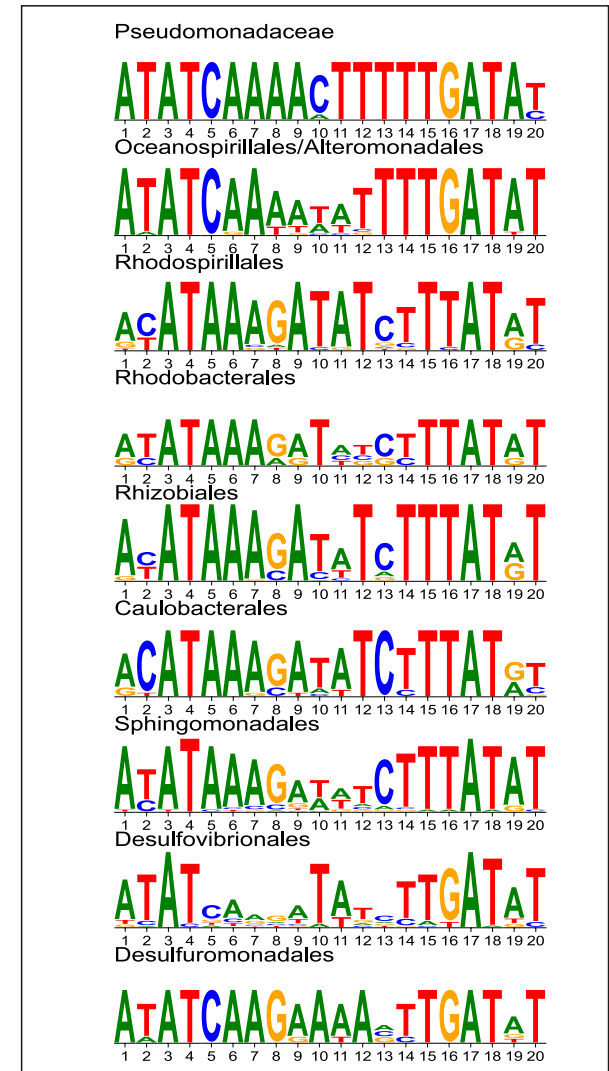

# SamR

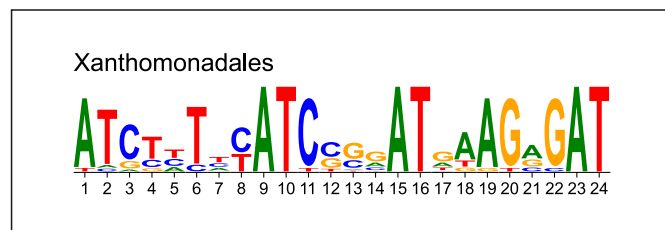

Figure S1. Predicted DNA-binding motifs of MetJ, MetR, SahR and SamR regulators in the analyzed taxonomic groups of Proteobacteria.
